# Supplementary material for: Synergistic activation of peroxymonosulfate by highly dispersed iron-based sulfur–nitrogen co-doped porous carbon for bisphenol a removal: mechanistic insights and selective oxidation
Source: Royal Society of Chemistry journal article supplement (doi:10.1039/d4ra08729a), 2025-01-01
Supplement: d4ra08729a1.pdf [file d4ra08729a1.pdf]

1

## Supporting Information

2

3 **Synergistic activation of peroxymonosulfate by highly dispersed iron-**  
4 **based sulfur-nitrogen co-doped porous carbon for Bisphenol A removal:**  
5 **Mechanistic insights and selective oxidation**

6

7 **Yu Sun, Chuning Zhang, Yan Jia\*, Yalei Zhang, Jianwei Fan**

8 *State Key Laboratory of Pollution Control and Resources Reuse, College*  
9 *of Environmental Science and Engineering, Shanghai Institute of*  
10 *Pollution Control and Ecological Security, Tongji University, Shanghai*  
11 *200092, P.R. China*

12

13 **\*Corresponding Author**

14 E-mail address: [jiay@tongji.edu.cn](mailto:jiay@tongji.edu.cn) (Yan Jia)

## 15 **Texts**

16 **Text S1.** Reagents and chemicals.

17 **Text S2.** Characterizations.

18 **Text S3.** Experimental details of the EPR analysis.

19 **Text S4.** Electrochemical test.

20

## 21 **Tables**

22 **Table S1.** HPLC conditions for organic contaminants

23 **Table S2.** Surface elemental content of FeSNC

24 **Table S3.** BET specific surface area, pore volume and pore size of FeSNC, FeNC and  
25 SNC

26 **Table S4.** Comparison of the catalytic activity of FeSNC with reported catalysts

27 **Table S5.** Actual Fe content of FeSNC and FeNC

28

## 29 **Figures**

30 **Fig. S1.** Preparation of FeSNC catalyst

31 **Fig. S2.** XPS survey of FeSNC

32 **Fig. S3.** Kinetic curves of BPA adsorption by FeSNC

33 **Fig. S4.** (a) XPS survey of used FeSNC; High-resolution XPS spectrum of (b) Fe 2p, (c) S  
34 2p and (d) N 1s of used FeSNC.

35

36 **Text S1.** Reagents and Chemicals.

37 Potassium monopersulfate triple salt (PMS,  $\text{KHSO}_5 \cdot 0.5\text{KHSO}_4 \cdot 0.5\text{K}_2\text{SO}_4$ ,  $\geq 99.5\%$ ),  
38 1-allylthiourea, Iron nitrate nonahydrate ( $\text{Fe}(\text{NO}_3)_3 \cdot 9\text{H}_2\text{O}$ ), bisphenol A (BPA),  
39 Rhodamine B (RhB), sulfamethoxazole (SMX), hydrochloric acid (HCl, 37 wt.%),  
40 sodium hydroxide (NaOH), sulfuric acid ( $\text{H}_2\text{SO}_4$ ,  $> 98.0\%$ ), methyl alcohol (MeOH),  
41 ethanol absolute (EtOH), acetonitrile (ACN), Formate, isopropyl alcohol (IPA), tert-  
42 butyl alcohol (TBA) and furfuryl alcohol (FFA) were purchased from Sinopharm  
43 Chemical Reagent Co., Ltd., China. Potassium thiocyanate (KSCN), p-Benzoquinone  
44 (q-BQ), Norfloxacin (OFL), 4-Chlorophenol (4-CP), Methyl Phenyl Sulfoxide (PMSO),  
45 5,5-Dimethyl-1-pyrroline N-oxide (DMPO,  $\geq 97\%$ ), and 2,2,6,6-tetramethyl-4-  
46 piperidinol (TEMP, 99 %) were obtained from Aladdin Biochemical co., Ltd. (Shanghai,  
47 China). P-Chlorophenol (4-CP) was obtained from Shanghai Macklin Biochemical Co.,  
48 Ltd. Benzoic acid (BA) and 4-nitrophenol (4-NP) was purchased from Shanghai Boer  
49 Chemical Reagent Co., Ltd. Silicon dioxide ( $\text{SiO}_2$ ) powder (20 nm) was purchased  
50 from Jinan Zhiding Welding Material Co., Ltd. Except for the mobile phase, which is  
51 chromatographically pure, all chemicals are of analytical grade and used without any  
52 further purification. Deionized water (18.25 M $\Omega$  cm) was used in all experiments.

53

54 **Text S2.** Characterizations.

55 The morphology of elements on the surface of FeSNC was examined using  
56 Scanning Electron Microscope (SEM) (Zeiss Merlin Compact). Energy Dispersive X-ray  
57 Detector (EDX) was analyzed by EDAX Inc. GENESIS. The degree of graphitization and  
58 defects in FeSNC was observed by Raman spectroscopy (Horiba LabRAM HR  
59 Evolution). The specific surface area, pore volume, pore size distribution and  $\text{N}_2$   
60 adsorption-desorption isotherms were determined by Quantachrome Autosorb-IQ3  
61 analyzer. The specific surface areas ( $S_{\text{BET}}$ ) were calculated using Brunauer-Emmett-  
62 Teller (BET) equation, and the pore size distribution was calculated using the Barrett-  
63 Joyner-Halenda (BJH) model. X-Ray Diffraction (XRD) patterns were obtained using  
64 Bruker D8 Advance equipped with Cu  $\text{K}\alpha$  radiation (40kV, 40 mA). X-ray

65 Photoelectron Spectroscopy (XPS) analysis was carried out on a Thermo Scientific K-  
66 Alpha X-ray Photoelectron Spectrometer with Al K $\alpha$  X-ray ( $h\nu = 1486.6$  eV) radiation.  
67

68 **Text S3.** Experimental details of the EPR analysis.

69 The common DMPO and TEMP were used as spin trapping agents. In the water-  
70 mediated system, DMPO was used to trap  $\cdot\text{OH}/\text{SO}_4^{\cdot-}$  and TEMP was used to trap  $^1\text{O}_2$   
71 produced in the reaction. In the methanol-mediated system, DMPO was used to trap  
72  $\text{O}_2^{\cdot-}$  produced. The specific operating parameters were: center magnetic field of  
73 3500.00 G, swept field width 100.0 G, power of 6.325 mW; microwave attenuation  
74 15.0 dB resonant frequency 9.826386 GHz, swept field time 30.00 s, modulation  
75 amplitude 1.000 G, modulation frequency 100.00 kHz, and number of sweeps 3  
76 times.

77

78 **Text S4.** Electrochemical test.

79 Using a standard three-electrode system, electrochemical experiments were  
80 performed on a CHI 660E electrochemical workstation. The working electrode was  
81 prepared as follows: 10.0 mg of FeSNC catalyst was weighed and mixed with 2.0 mL  
82 of ethanol and 0.25 mL of 5 wt.% Nafion solution (binder), and ultrasonication was  
83 carried out for 1 h to fully disperse the catalyst, and 20  $\mu\text{L}$  of the dispersion was  
84 coated on a glassy carbon electrode, which was dried overnight in an oven at 60  $^\circ\text{C}$ .  
85 A platinum sheet and a saturated silver chloride electrode were used as the counter  
86 electrode and reference electrode, respectively. The I-t curve of the catalyst was  
87 tested with 50 mM  $\text{Na}_2\text{SO}_4$  as the electrolyte, and the applied voltage was -0.5 V.  
88 PMS and organic pollutants were added to the electrolyte solution at 100 s and 200 s,  
89 respectively, and the current changes were observed.

**Table S1.** HPLC conditions for organic contaminants

| Organic pollutants | mobile phase (V/V)                            | flow rate (mL·min <sup>-1</sup> ) | Wavelength (nm) |
|--------------------|-----------------------------------------------|-----------------------------------|-----------------|
| BPA                | MeOH/UPW = 70/30                              | 1.0                               | 230             |
| SMX                | ACN/UPW = 30/70                               | 1.0                               | 265             |
| OFL                | ACN/1% Phosphoric acid = 15/85                | 1.0                               | 288             |
| 4-CP               | MeOH/UPW = 70/30                              | 1.0                               | 278             |
| NB                 | ACN/UPW = 50/50                               | 1.0                               | 270             |
| TC                 | MeOH/0.1% Phosphoric acid = 60/401.0          | 1.0                               | 360             |
| BA                 | MeOH/ 0.2 M ammonium acetate solution = 10/90 | 1.0                               | 230             |

**Table S2.** Surface elemental content of FeSNC

| Name | Atomic % | PP At. % |
|------|----------|----------|
| C1s  | 87.49    | 91.92    |
| Fe2p | 0.33     | 0.11     |
| N1s  | 11.47    | 6.84     |
| S2p  | 0.72     | 1.12     |

**Table S3.** BET specific surface area, pore volume and pore size of FeSNC, FeNC and SNC

| catalyst | S <sub>BET</sub> (m <sup>2</sup> ·g <sup>-1</sup> ) | pore volume (cm <sup>3</sup> ·g <sup>-1</sup> ) | Average pore size (nm) |
|----------|-----------------------------------------------------|-------------------------------------------------|------------------------|
| FeSNC    | 349.1                                               | 0.618                                           | 7.93                   |
| FeNC     | 90.1                                                | 0.119                                           | 6.63                   |
| SNC      | 360.7                                               | 0.849                                           | 10.82                  |

**Table S4.** Comparison of the catalytic activity of FeSNC with reported catalysts

| Catalyst dosage (mg/L)                                                     | PMS (mM) | Pollutants (mg/L) | Removal Efficacy (%) | Reaction Time (min) | Ref.      |
|----------------------------------------------------------------------------|----------|-------------------|----------------------|---------------------|-----------|
| FeSNC (0.1)                                                                | 1.00     | BPA (20)          | 100                  | 3                   | This work |
| DPA-Fe <sub>2</sub> O <sub>3</sub> (0.5)                                   | 3.25     | BPA (15)          | 90                   | 120                 | (1)       |
| Fe <sub>0.8</sub> Co <sub>2.2</sub> O <sub>4</sub> (0.1)                   | 0.33     | BPA (20)          | 95                   | 60                  | (2)       |
| CuFe <sub>2</sub> O <sub>4</sub> (0.4)                                     | 0.81     | BPA (50)          | 95                   | 60                  | (3)       |
| GAC (1.0)                                                                  | 5.70     | AO7 (20)          | 100                  | 60                  | (4)       |
| N-rGO (0.12)                                                               | 0.8      | BPA (88)          | 95                   | 7                   | (5)       |
| Ca-BSAC (0.1)                                                              | 0.33     | BPA (22.83)       | 100                  | 30                  | (6)       |
| FeCNx-700 (50)                                                             | 0.15     | BPA (0.088)       | 94                   | 5                   | (7)       |
| FeCo <sub>2</sub> S <sub>4</sub> -CN (20)                                  | 0.15     | SMX (4.99)        | 91.9                 | 15                  | (8)       |
| 3D $\gamma$ -MnO <sub>2</sub> @ZnFe <sub>2</sub> O <sub>4</sub> /rGO (0.1) | 6.5      | Phenol (20)       | 100                  | 30                  | (9)       |
| Co@N-C (0.1)                                                               | 0.25     | BPA (10)          | 100                  | 10                  | (10)      |
| FeOOH/Mt-TC-C (0.1)                                                        | 1.00     | BPA (20)          | 100                  | 30                  | (11)      |
| FeNP-N-C (0.15)                                                            | 0.66     | BPA (20)          | 100                  | 30                  | (12)      |
| Pd/g-C <sub>3</sub> N <sub>4</sub> (0.1)                                   | 1.00     | BPA (20)          | 60                   | 91                  | (13)      |
| Fe-NS@C (0.1)                                                              | 1.00     | BPA (20)          | 100                  | 15                  | (14)      |
| Fe-N-BC (0.2)                                                              | 1.00     | AO7 (20)          | 100                  | 90                  | (15)      |
| FeSA-N-C-20 (0.15)                                                         | 0.65     | BPA (20)          | 100                  | 30                  | (16)      |
| EC-700-W (0.2)                                                             | 0.5      | SDZ (10)          | 100                  | 60                  | (17)      |
| SA-Mn-NC (0.05)                                                            | 1.0      | BPA (20)          | 100                  | 5                   | (18)      |
| NGC700 (0.1)                                                               | 0.65     | BPA (20)          | 98                   | 4                   | (19)      |

**Table S5.** Actual Fe content of FeSNC and FeNC

| catalyst | Me (wt.%) |
|----------|-----------|
| FeSNC    | 0.64      |
| FeNC     | 4.81      |

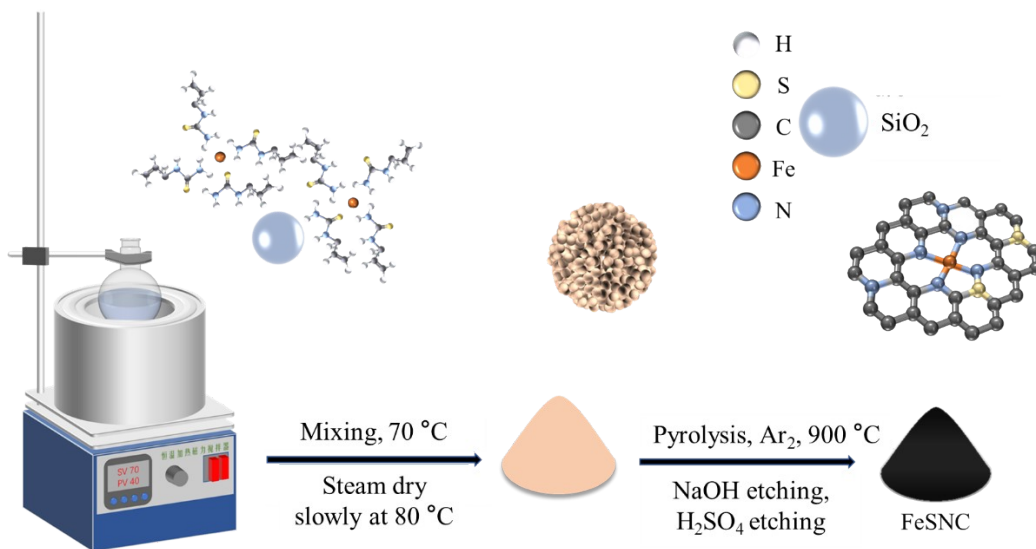

**Fig. S1.** Preparation of FeSNC catalyst

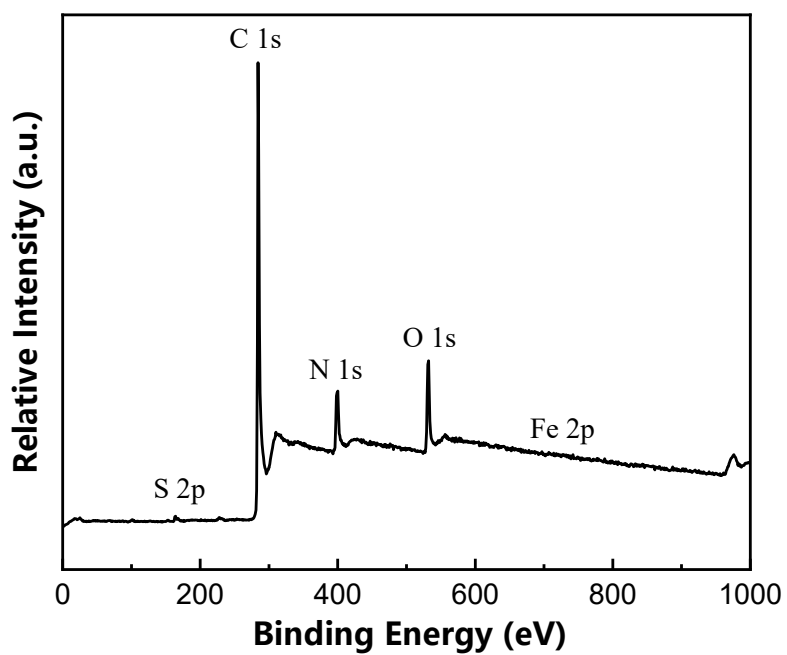

**Fig. S2.** XPS survey of FeSNC.

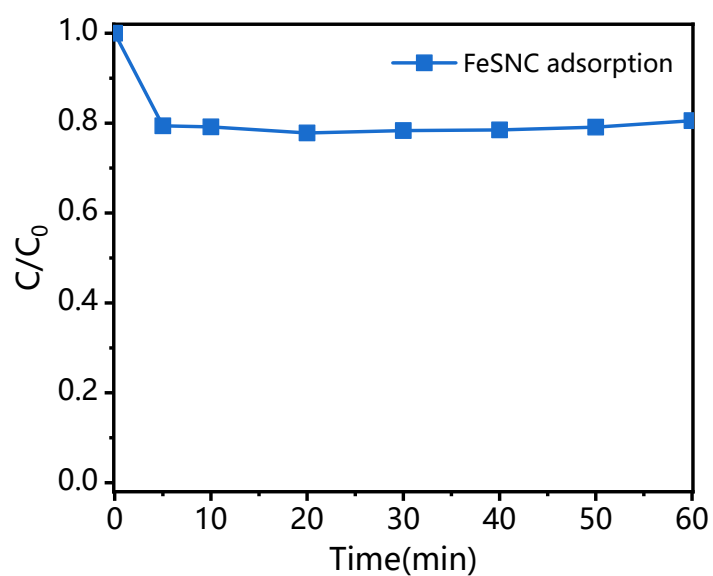

**Fig. S3.** Kinetic curves of BPA adsorption by FeSNC.

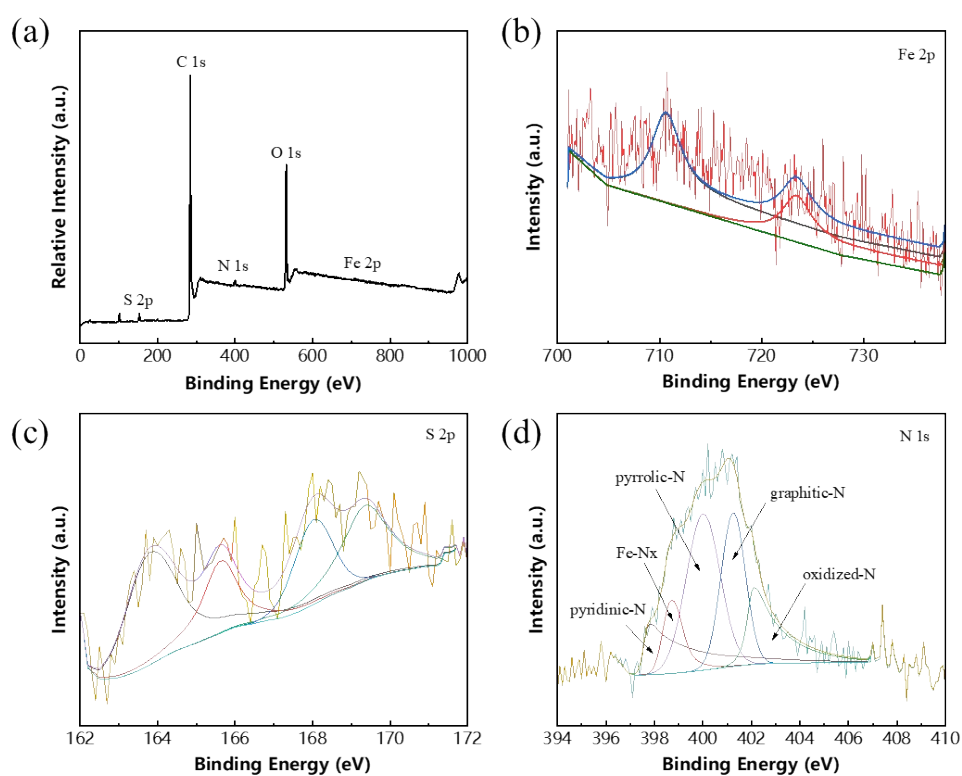

**Fig. S4.** (a) XPS survey of used FeSNC; High-resolution XPS spectrum of (b) Fe 2p, (c) S 2p and (d) N 1s of used FeSNC.



## Reference

1. Oh WD, Lua SK, Dong Z, Lim TT. High surface area DPA-hematite for efficient detoxification of bisphenol A via peroxymonosulfate activation. *Journal of Materials Chemistry A*. 2014;2(38):15836-45.
2. Li X, Wang Z, Zhang B, Rykov AI, Ahmed MA, Wang J.  $\text{Fe}_x\text{Co}_{3-x}\text{O}_4$  nanocages derived from nanoscale metal-organic frameworks for removal of bisphenol A by activation of peroxymonosulfate. *Applied Catalysis B: Environmental*. 2016;181:788-99.
3. Xu Y, Ai J, Zhang H. The mechanism of degradation of bisphenol A using the magnetically separable  $\text{CuFe}_2\text{O}_4$ /peroxymonosulfate heterogeneous oxidation process. *Journal of Hazardous Materials*. 2016;309:87-96.
4. Zhang J, Shao X, Shi C, Yang S. Decolorization of Acid Orange 7 with peroxymonosulfate oxidation catalyzed by granular activated carbon. *Chemical Engineering Journal*. 2013;232:259-65.
5. Wang X, Tang P, Ding C, Cao X, Yuan S, Zuo X, et al. Simultaneous enhancement of adsorption and peroxymonosulfate activation of Nitrogen-doped reduced graphene oxide for bisphenol A removal. *Journal of Environmental Chemical Engineering*. 2017;5(5):4291-7.
6. Huang B-C, Huang G-X, Jiang J, Liu W-J, Yu H-Q. Carbon-Based Catalyst Synthesized and Immobilized under Calcium Salt Assistance To Boost Singlet Oxygen Evolution for Pollutant Degradation. *ACS Applied Materials & Interfaces*. 2019;11(46):43180-7.
7. Miao W, Liu Y, Wang D, Du N, Ye Z, Hou Y, et al. The role of Fe-N<sub>x</sub> single-atom catalytic sites in peroxymonosulfate activation: Formation of surface-activated complex and non-radical pathways. *Chemical Engineering Journal*. 2021;423:130250.
8. Li Y, Li J, Pan Y, Xiong Z, Yao G, Xie R, et al. Peroxymonosulfate activation on  $\text{FeCo}_2\text{S}_4$  modified g-C<sub>3</sub>N<sub>4</sub> ( $\text{FeCo}_2\text{S}_4\text{-CN}$ ): Mechanism of singlet oxygen evolution for nonradical efficient degradation of sulfamethoxazole. *Chemical Engineering Journal*. 2020;384:123361.
9. Mady AH, Baynosa ML, Tuma D, Shim J-J. Heterogeneous activation of peroxymonosulfate by a novel magnetic 3D  $\gamma\text{-MnO}_2@Zn\text{Fe}_2\text{O}_4/\text{rGO}$  nanohybrid as a robust catalyst for phenol degradation. *Applied Catalysis B: Environmental*. 2019;244:946-56.
10. Li H, Tian J, Zhu Z, Cui F, Zhu Y-A, Duan X, et al. Magnetic nitrogen-doped nanocarbons for enhanced metal-free catalytic oxidation: Integrated experimental and theoretical investigations for mechanism and application. *Chemical Engineering Journal*. 2018;354:507-16.
11. Yang S, Duan X, Liu J, Wu P, Li C, Dong X, et al. Efficient peroxymonosulfate activation and bisphenol A degradation derived from mineral-carbon materials: Key role of double mineral-templates. *Applied Catalysis B: Environmental*. 2020;267:118701.
12. Li Y, Yang T, Qiu S, Lin W, Yan J, Fan S, et al. Uniform N-coordinated single-

atomic iron sites dispersed in porous carbon framework to activate PMS for efficient BPA degradation via high-valent iron-oxo species. *Chemical Engineering Journal*. 2020;389.

13. Wang Y, Cao D, Liu M, Zhao X. Insights into heterogeneous catalytic activation of peroxymonosulfate by Pd/g-C<sub>3</sub>N<sub>4</sub>: The role of superoxide radical and singlet oxygen. *Catalysis Communications*. 2017;102:85-8.

14. Chen W, Lei L, Zhu K, He D, He H, Li X, et al. Peroxymonosulfate activation by Fe-N-S co-doped tremella-like carbocatalyst for degradation of bisphenol A: Synergistic effect of pyridine N, Fe-N<sub>x</sub>, thiophene S. *Journal of Environmental Sciences*. 2023;129:213-28.

15. Li X, Jia Y, Zhou M, Su X, Sun J. High-efficiency degradation of organic pollutants with Fe, N co-doped biochar catalysts via persulfate activation. *Journal of Hazardous Materials*. 2020;397:122764.

16. Li Y, Yang T, Qiu S, Lin W, Yan J, Fan S, et al. Uniform N-coordinated single-atomic iron sites dispersed in porous carbon framework to activate PMS for efficient BPA degradation via high-valent iron-oxo species. *Chemical Engineering Journal*. 2020;389:124382.

17. Niu L, Lei Q, Zhao T, Tang Z, Cai Y, Hou D, et al. In situ N-doping engineered biochar catalysts for oxidation degradation of sulfadiazine via nonradical pathways: Singlet oxygen and electron transfer. *Science of The Total Environment*. 2024;939:173206.

18. Jia Y, Chen Y, Xue Y, Fan J. Efficient activation of peroxymonosulfate by Mn single-atom: Critical role of Mn-N<sub>4</sub> coordination for generating singlet oxygen. *Separation and Purification Technology*. 2024;335.

19. Luo R, Li M, Wang C, Zhang M, Nasir Khan MA, Sun X, et al. Singlet oxygen-dominated non-radical oxidation process for efficient degradation of bisphenol A under high salinity condition. *Water Research*. 2019;148:416-24.
